# Supplementary material
Source: publisher figshare collection journal article supplement (https://frontiersin.figshare.com/ndownloader/files/21932688)
Supplement: Supplementary file 1 [file 21932688]

## Supporting information

**Table S1.** Ion concentrations ( $\text{mg kg}^{-1}$ ) of leaf dry matter, sampled during the summer (August) in the Mediterranean site (Med) and the semi-arid site (SA). Sampled leaves were analyzed using inductively coupled plasma - atomic emission spectroscopy (ICP-AES, Arcos, Spectro, Kleve, Germany). Cl- analyzed separately with a chloridometer (chloride analyzer 926, Corning, Medfield, MA).

| Ion ( $\text{mg kg}^{-1}$ ) | Site               |                     |
|-----------------------------|--------------------|---------------------|
|                             | Mediterranean      | Semi-arid           |
| Na                          | 91 $\pm$ 4.4       | 310.3 $\pm$ 47      |
| P                           | 1328.3 $\pm$ 62.7  | 1202.6 $\pm$ 63     |
| K                           | 7748.5 $\pm$ 828.2 | 10176.7 $\pm$ 939.1 |
| S                           | 1428.6 $\pm$ 34.5  | 1240.4 $\pm$ 64.4   |
| Mg                          | 4483.3 $\pm$ 446   | 4773 $\pm$ 367.2    |
| Mn                          | 99 $\pm$ 14        | 191.7 $\pm$ 20.9    |
| Zn                          | 26 $\pm$ 1.3       | 25.1 $\pm$ 1.7      |
| Ca                          | 11488.6 $\pm$ 47   | 11422.8 $\pm$ 132.8 |
| Fe                          | 62.3 $\pm$ 13.9    | 79.2 $\pm$ 9.8      |
| B                           | 52.2 $\pm$ 3       | 71.8 $\pm$ 12.8     |
| Cl                          | 4791.5 $\pm$ 825   | 3389.6 $\pm$ 383.1  |

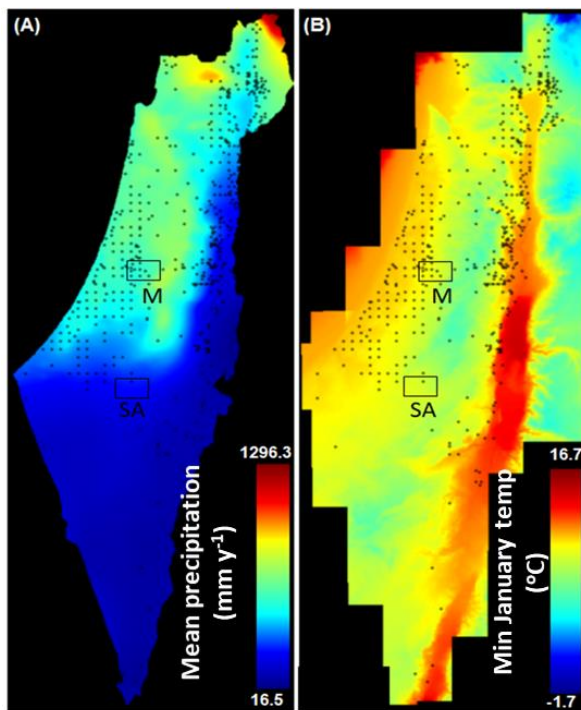

Fig S1. BioGIS diversity analysis based, 2018 (Geographical Information System established to create a national database of flora and fauna of Israel), shows the distribution of the *Ziziphus spina-christi* against the average annual rainfall (A) and against the minimum temperature in January (B) . Each point on the maps represents a *Ziziphus spina-christi* observation, n= 590 trees

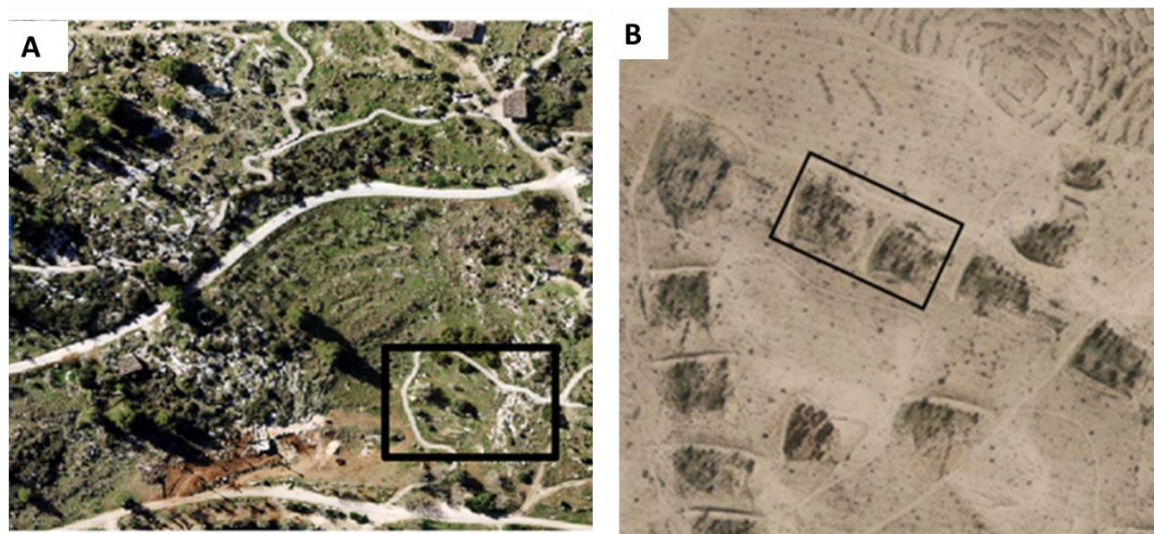

Fig S2 Aerial view of the experiment site showing the Mediterranean site-natural habitat in Neot Kedumim preserve (A) and the semi-arid site- "Ambassadors Forest."



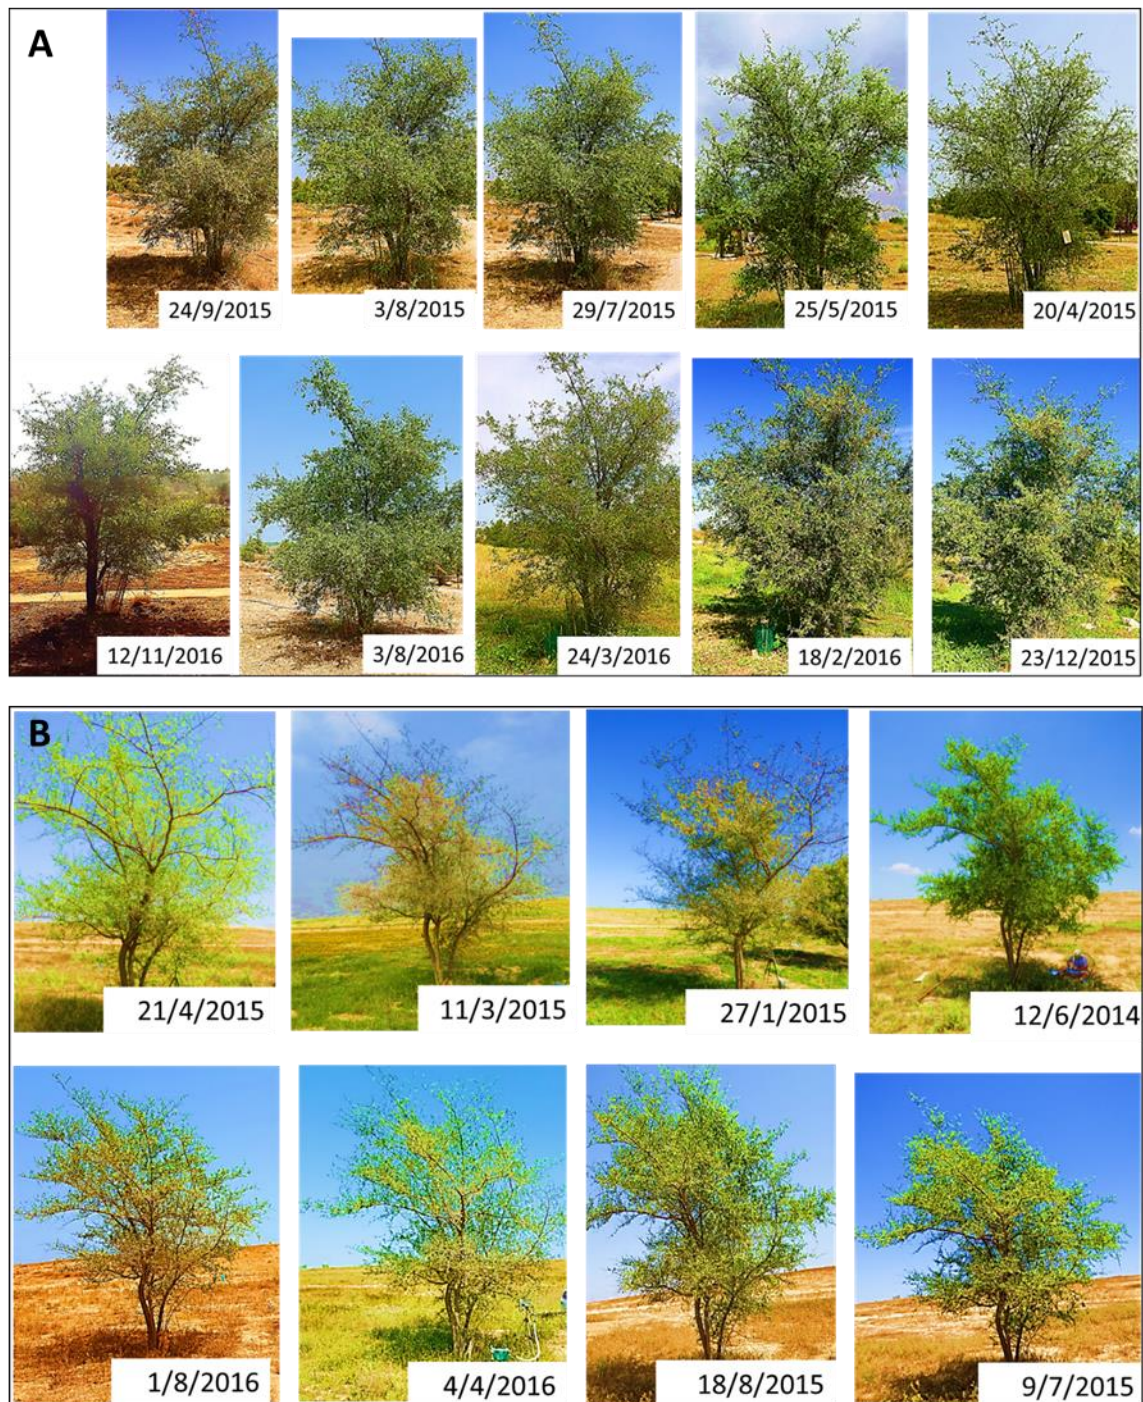

Fig S3. Images are showing the trees foliage changes throughout the study period in the Mediterranean site-natural habitat in Neot Kedumim preserve (A) and in the semi-arid site-“Ambassadors Forest” (B).
